# Supplementary material
Source: PubMed Central journal article supplement (PMC4152373)
Supplement: NIHMS617303-supplement-supplement_1.pdf [file NIHMS617303-supplement-supplement_1.pdf]

## SUPPLEMENTARY MATERIALS

### *Norming for “color similarity”:*

To ensure that word pairs selected for the “color-related” condition indeed referred to things that are likely to be the same color, two separate groups of 30 participants (who did not participate in the priming study) were presented with the following instructions:

Two words will appear on the screen.

Picture the objects that the words refer to and rate them according to how likely they are to be the same color.

For example, “brownie” and “moose” refer to things that are often very similar in color. Therefore this pair would get a higher rating than “carpet” and “grapes”, which refer to things that are often different in color.

Use this scale:

|                   |   |   |   |   |   |   |                   |
|-------------------|---|---|---|---|---|---|-------------------|
| 1                 | 2 | 3 | 4 | 5 | 6 | 7 |                   |
| very unlikely     |   |   |   |   |   |   | very likely       |
| to be the         |   |   |   |   |   |   | to be the         |
| same <u>color</u> |   |   |   |   |   |   | same <u>color</u> |

### *Norming for “importance of color”:*

To ensure that color is important for recognizing objects that comprised color-related pairs, a separate group of 30 participants (who did not participate in the priming study or the norming study described above) were asked to rate each object on “How important is color for recognizing this object?” on a 1-7 scale, from “not important” to “extremely important”.

### *Instructions for animal judgment priming task:*

“On each trial, one word will flash and then a second word will stay on the screen. Press “A” if the second word is an animal. Press “I” if it is not an animal. (Do not respond to the first word unless you see the prompt “Was the first word an animal?”).

### *Post-test questions*

All 120 participants were given a post-test questionnaire that asked what they thought the experiment was about. Ninety-three were also explicitly asked whether they noticed any relationships between the first and second word. No participant guessed the purpose of the experiment, and only two noticed that the 1<sup>st</sup> and 2<sup>nd</sup> words occasionally referred to things of the same color. The pattern was unchanged with these two participants removed (in fact, effects were stronger).

### *Stroop task procedure (additional details)*

The word remained on the screen until the response. The inter-trial interval was 500ms.

**STIMULI:**

| <u>RELATED PRIME</u> | <u>CONTROL PRIME</u> | <u>TARGET</u>     |
|----------------------|----------------------|-------------------|
| toast                | candy                | acorn             |
| cigar                | mirror               | almond            |
| ruby                 | kite                 | apple             |
| basil                | curry                | asparagus         |
| ivy                  | wine                 | avocado           |
| dandelion            | carnation            | banana            |
| sour cream           | padlock              | baseball          |
| carrot               | doorknob             | basketball        |
| tomato               | onion                | beets             |
| garlic               | sandwich             | birch             |
| sugar                | curtain              | bone              |
| radish               | necklace             | brick             |
| lawn                 | granola              | broccoli          |
| lemonade             | club soda            | butter            |
| chopsticks           | chocolate            | cardboard box     |
| panther              | leopard              | cauldron          |
| mayonnaise           | vinegar              | cauliflower       |
| lily pad             | mushroom             | celery            |
| duct tape            | flashlight           | cement            |
| polar bear           | kangaroo             | chalk             |
| sun                  | barn                 | cheese            |
| rose                 | tulip                | cherry            |
| tuxedo               | sneakers             | coal              |
| emerald              | pendant              | cucumber          |
| corn                 | wheat                | daffodil          |
| toilet paper         | toothbrush           | egg               |
| plum                 | pineapple            | eggplant          |
| lime                 | berry                | fern              |
| pepperoni            | lantern              | fire extinguisher |
| iguana               | scorpion             | forest            |
| swan                 | duck                 | ghost             |
| beaver               | chicken              | gingersnap        |
| cotton               | mitten               | glue              |
| peas                 | nest                 | grass             |
| frog                 | moth                 | guacamole         |
| canary               | pigeon               | highlighter       |
| egg yolk             | yogurt               | lemon             |
| dollar               | sandal               | lettuce           |
| lizard               | beetle               | lima bean         |
| potato               | canteen              | log               |
| snowball             | hammer               | marshmallow       |
| snow                 | key                  | milk              |
| cinnamon             | vanilla              | nut               |
| grasshopper          | tarantula            | palm tree         |
| spinach              | pretzel              | pear              |
| salt                 | bagel                | pearls            |
| algae                | mold                 | pickle            |
| beans                | oats                 | pine tree         |
| cabbage              | pasta                | relish            |
| lab coat             | test tube            | rice              |
| heart                | bracelet             | salsa             |
| mustard              | violin               | school bus        |
| ketchup              | telephone            | stop sign         |
| blood                | beer                 | strawberry        |
| sunflower            | laptop               | taxicab           |
| raven                | robin                | tire              |
| clover               | spider               | vine              |
| iceberg              | mountain             | volleyball        |
| peanut butter        | sunglasses           | wood              |
